# Supplementary material for: SARS-CoV-2 seroprevalence and neutralizing activity in donor and patient blood
Source: PubMed Central journal article supplement (PMC7499171; doi:10.1038/s41467-020-18468-8), 2020-09-17
Supplement: 41467_2020_18468_MOESM1_ESM.pdf [file 41467_2020_18468_MOESM1_ESM.pdf]

## SUPPLEMENTARY MATERIAL

### SARS-CoV-2 seroprevalence and neutralizing activity in donor and patient blood

Dianna L. Ng<sup>1,2#</sup>, Gregory M. Goldgof<sup>1#</sup>, Brian R. Shy<sup>1#</sup>, Andrew G. Levine<sup>1#</sup>, Joanna Balcerek<sup>1#</sup>, Sagar P. Bapat<sup>1#</sup>, John Probst<sup>4</sup>, Mary Rodgers<sup>4</sup>, Kelly Collier<sup>4</sup>, Sandra Pearce<sup>4</sup>, Sergej Franz<sup>3</sup>, Li Du<sup>3</sup>, Mars Stone<sup>1,3</sup>, Satish K. Pillai<sup>3</sup>, Alicia Sotomayor-Gonzalez<sup>1,5</sup>, Venice Servellita<sup>1,5</sup>, Claudia Sanchez San Martin<sup>1,5</sup>, Andrea Granados<sup>1,5</sup>, Dustin R. Glasner<sup>1,5</sup>, Lucy M. Han<sup>1,2</sup>, Kent Truong<sup>1,2</sup>, Naomi Akagi<sup>1,2</sup>, David N. Nguyen<sup>6</sup>, Neil M. Neumann<sup>2</sup>, Daniel Qazi<sup>2</sup>, Elaine Hsu<sup>1</sup>, Wei Gu<sup>1</sup>, Yale A. Santos<sup>1,5</sup>, Brian Custer<sup>3</sup>, Valerie Green<sup>7</sup>, Phillip Williamson<sup>7</sup>, Nancy K. Hills<sup>8,9</sup>, Chuanyi M. Lu<sup>1,10</sup>, Jeffrey D. Whitman<sup>1</sup>, Susan L. Stramer<sup>11</sup>, Candace Wang<sup>1,5</sup>, Kevin Reyes<sup>1,5</sup>, Jill M.C. Hakim<sup>12</sup>, Kirk Sujishi<sup>1</sup>, Fariba Alazzez<sup>1</sup>, Lori Pham<sup>1</sup>, Edward Thornborrow<sup>1</sup>, Ching-Ying Oon<sup>1</sup>, Steve Miller<sup>1,5</sup>, Theodore Kurtz<sup>1</sup>, Graham Simmons<sup>1,3&</sup>, John Hackett, Jr.<sup>4&</sup>, Michael P. Busch<sup>1,3&</sup>, Charles Y. Chiu<sup>1,5,6&\*</sup>

<sup>1</sup>Department of Laboratory Medicine, University of California, San Francisco, San Francisco, CA, USA

<sup>2</sup>Department of Pathology, University of California, San Francisco, San Francisco, CA, USA

<sup>3</sup>Vitalant Research Institute, San Francisco, CA, USA

<sup>4</sup>Applied Research and Technology, Abbott Diagnostics, Abbott Park, IL, USA

<sup>5</sup>UCSF-Abbott Viral Diagnostics and Discovery Center, San Francisco, CA, USA

<sup>6</sup>Department of Medicine, Division of Infectious Diseases, University of California, San Francisco, San Francisco, CA, USA

<sup>7</sup>Creative Testing Solutions, Tempe, AZ, USA

<sup>8</sup>Department of Neurology, University of California, San Francisco, San Francisco, CA, USA

<sup>9</sup>Department of Epidemiology and Biostatistics, University of California, San Francisco, San Francisco, CA, USA

<sup>10</sup>Lab Medicine Service, San Francisco VA Healthcare System

<sup>11</sup>American Red Cross, Gaithersburg, MD, USA

<sup>12</sup>Department of Medicine at ZSFG, the Division of HIV, ID & Global Medicine

#These authors contributed equally to this work: Dianna L. Ng, Gregory M. Goldgof, Brian R. Shy, Andrew G. Levine, Joanna Balcerek, Sagar P. Bapat

\*These authors jointly supervised this work: Charles Y. Chiu, Michael P. Busch, John Hackett, Jr., Graham Simmons



**TABLE OF CONTENTS**

Supplementary Table 1 ..... 3

Supplementary Table 1 ..... 5

Supplementary Table 1 ..... 6

Supplementary Table 1 ..... 7

**Supplementary Table 1.** Demographic characteristics, presenting symptoms, chronic medical conditions, medications, and radiographic findings of 43 SARS-CoV-2 PCR-positive UCSF outpatients and hospitalized patients.

| <b>Clinical characteristic</b> | <b>Positive<br/>(n=43)</b> |
|--------------------------------|----------------------------|
| Age (years)                    | 59±18                      |
| Male                           | 28 (65.1%)                 |
| Female                         | 12 (27.9%)                 |
| Other/Unknown                  | 3 (6.98%)                  |
| <b>Racial or ethnic group</b>  |                            |
| Hispanic/LatinX                | 8 (18.6%)                  |
| Asian                          | 7 (16.3%)                  |
| White                          | 12 (27.9%)                 |
| Black                          | 2 (4.65%)                  |
| Other/not reported             | 14 (32.6%)                 |
| <b>Smoking status</b>          |                            |
| Never smoker                   | 19 (44.2%)                 |
| Former smoker                  | 11 (25.6%)                 |
| Current smoker                 | 1 (2.33%)                  |
| Unknown/not reported           | 11 (25.6%)                 |
| <b>Presenting symptoms</b>     |                            |
| Cough                          | 32 (74.4%)                 |
| Fever                          | 27 (62.8%)                 |
| Myalgia                        | 15 (34.9%)                 |
| Shortness of breath/Dyspnea    | 19 (44.2%)                 |
| Chest pain                     | 7 (16.3%)                  |
| Headache                       | 8 (18.6%)                  |
| Chills                         | 9 (20.9%)                  |
| Sore throat                    | 7 (16.3%)                  |
| Malaise/fatigue                | 21 (48.8%)                 |
| Diarrhea                       | 10 (23.3%)                 |
| Anorexia                       | 5 (11.6%)                  |
| Nausea and/or vomiting         | 5 (11.6%)                  |
| Anosmia and/or dysgeusia       | 2 (4.65%)                  |
| Asymptomatic                   | 2 (4.65%)                  |
| Not documented                 | 3 (6.98%)                  |
|                                |                            |

| <b>Chronic medical conditions</b>                                |            |
|------------------------------------------------------------------|------------|
| Hypertension                                                     | 16 (37.2%) |
| Type 2 Diabetes Mellitus                                         | 14 (32.6%) |
| Hyperlipidemia                                                   | 10 (23.3%) |
| Obesity                                                          | 9 (20.9%)  |
| Chronic Kidney Disease                                           | 8 (18.6%)  |
| Hypothyroid                                                      | 7 (16.3%)  |
| Solid organ transplant                                           | 6 (14.0%)  |
| Coronary Artery Disease                                          | 7 (16.3%)  |
| Asthma                                                           | 3 (6.98%)  |
| Autoimmune Disease                                               | 2 (4.65%)  |
| Congestive Heart Failure                                         | 4 (9.30%)  |
| Liver disease                                                    | 1 (2.33%)  |
| Malignancy                                                       | 2 (4.65%)  |
| Emphysema/COPD                                                   | 0 (0%)     |
| Prior stroke                                                     | 4 (9.30%)  |
| HIV                                                              | 0 (0%)     |
| No co-morbidities                                                | 2 (4.65%)  |
| Medical history not documented                                   | 6 (14.0%)  |
| <b>Medications</b>                                               |            |
| ACE inhibitor use                                                | 5 (11.6%)  |
| Chemotherapy                                                     | 0 (0%)     |
| Immunosuppressive agents                                         | 7 (16.3%)  |
| Remdesivir (or placebo)                                          | 12 (27.9%) |
| Hydroxychloroquine                                               | 6 (14.0%)  |
| Corticosteroids                                                  | 2 (4.65%)  |
| Not documented                                                   | 9 (20.9%)  |
| <b>Severity</b>                                                  |            |
| Ambulatory*                                                      | 8 (18.6%)  |
| Admitted                                                         | 29 (67.4%) |
| ICU                                                              | 15 (34.9%) |
| Not documented                                                   | 1 (2.33%)  |
| <b>Radiographic findings, chest X-ray or computed tomography</b> |            |
| Unilateral infiltrates                                           | 2 (4.65%)  |
| Bilateral infiltrates                                            | 22 (51.2%) |
| Ground glass opacities                                           | 11 (25.6%) |
| Consolidation                                                    | 11 (25.6%) |
| Normal imaging                                                   | 5 (11.6%)  |
| Imaging not performed                                            | 5 (11.6%)  |
| Not documented                                                   | 6 (14.0%)  |

\*Ambulatory care includes outpatient and patients seen in ED and not admitted.

**Supplementary Table 2.** Demographic characteristics of individuals who donated blood at San Francisco Bay

Area community blood centers (Vitalant Research Institute).

|                             |                |
|-----------------------------|----------------|
| <b>Reported sex</b>         | Total (n=1000) |
| Male                        | 508            |
| Female                      | 491            |
| Other/Unknown               |                |
| <b>Age (years)</b>          |                |
| ≤19                         | 18             |
| 20-29                       | 152            |
| 30-39                       | 205            |
| 40-49                       | 172            |
| 50-59                       | 185            |
| 60-69                       | 197            |
| 70-79                       | 63             |
| 80-89                       | 7              |
| <b>Race or ethnic group</b> |                |
| White                       | 686            |
| Asian                       | 99             |
| Latino                      | 90             |
| Black                       | 15             |
| Other/Unknown               | 110            |

**Supplementary Table 3.** Demographic characteristics of UCSF patients with positive SARS-CoV-2 RT-PCR, negative SARS-CoV-2 RT-PCR, and patients who were not clinically suspected to have SARS-CoV-2 infection.

|                             | <b>SARS-CoV-2 RT-PCR<br/>Positive (n=43)</b> | <b>SARS-CoV-2 RT-PCR<br/>Negative (n=163)</b> | <b>SARS-CoV-2 RT-PCR<br/>Not Performed (n=387)</b> |
|-----------------------------|----------------------------------------------|-----------------------------------------------|----------------------------------------------------|
| <b>Reported sex</b>         |                                              |                                               |                                                    |
| Male                        | 28 (65.1%)                                   | 78 (47.9%)                                    | 172 (44.4%)                                        |
| Female                      | 12 (27.9%)                                   | 84 (51.5%)                                    | 186 (48.1%)                                        |
| Other/Unknown               | 3 (6.98%)                                    | 1 (0.6%)                                      | 29 (7.49%)                                         |
| <b>Age (years)</b>          |                                              |                                               |                                                    |
| ≤19                         | 0 (0%)                                       | 5 (3.1%)                                      | 15 (3.88%)                                         |
| 20-29                       | 1 (2.3%)                                     | 11 (6.7%)                                     | 28 (7.23%)                                         |
| 30-39                       | 7 (16.3%)                                    | 16 (9.8%)                                     | 41 (10.6%)                                         |
| 40-49                       | 7 (16.3%)                                    | 23 (14.1%)                                    | 54 (14.0%)                                         |
| 50-59                       | 9 (20.9%)                                    | 31 (19.0%)                                    | 68 (17.6%)                                         |
| 60-69                       | 3 (7.0%)                                     | 40 (24.5%)                                    | 71 (18.3%)                                         |
| 70-79                       | 10 (23.3%)                                   | 21 (12.9%)                                    | 56 (14.5%)                                         |
| 80-89                       | 4 (9.3%)                                     | 8 (4.9%)                                      | 20 (5.17%)                                         |
| 90-99                       | 2 (4.7%)                                     | 7 (4.3%)                                      | 5 (1.29%)                                          |
| Unknown                     | 0 (0%)                                       | 1 (0.6%)                                      | 29 (7.5%)                                          |
| <b>Race or ethnic group</b> |                                              |                                               |                                                    |
| White                       | 8 (18.6%)                                    | 74 (45.4%)                                    | 165 (42.6%)                                        |
| Asian                       | 7 (16.3%)                                    | 31 (19.0%)                                    | 85 (22.0%)                                         |
| Latinx                      | 12 (27.9%)                                   | 15 (9.2%)                                     | 37 (9.56%)                                         |
| Black                       | 2 (4.65%)                                    | 25 (15.3%)                                    | 36 (9.30%)                                         |
| Other/Unknown               | 14 (32.6%)                                   | 18 (11.0%)                                    | 64 (16.5%)                                         |

**Supplementary Table 4. Association of IgG, IgM, and neutralizing antibody (NT80) titers with disease severity in COVID-19 patients.**

|        | Not severe |                 | Severe (ICU/death) |               | p-value* |
|--------|------------|-----------------|--------------------|---------------|----------|
|        | median     | (IQR)           | median             | (IQR)         |          |
| IgG    |            |                 |                    |               |          |
| Week 1 | 0.05       | (0.02, 1.75)    | 1.165              | (0.025, 1.35) | 0.80     |
| Week 2 | 2.44       | (0.1875, 3.795) | 2.11               | (1.50, 4.72)  | 0.38     |
| Week 3 | 2.475      | (0.085, 5.315)  | 5.04               | (4.76, 5.54)  | 0.07     |
| Week4  | 3.965      | (1.42, 5.23)    | 5.33               | (4.90, 5.81)  | 0.05     |
| IgM    |            |                 |                    |               |          |
| Week 1 | 0.155      | (0.03, 1.065)   | 0.055              | (0.02, 9.705) | 0.75     |
| Week 2 | 2.17       | (0.11, 4.975)   | 6.31               | (1.12, 10.4)  | 0.34     |
| Week 3 | 1.36       | (0.12, 12.4)    | 13.0               | (6.84, 15.0)  | 0.067    |
| Week4  | 4.88       | (1.39, 8.53)    | 10.9               | (6.42, 17.8)  | 0.067    |
| NT80   |            |                 |                    |               |          |
| Week 1 | 41.8 (n=3) | (40, 73.0)      | 40 (n=3)           | (40.0, 135)   | 1.00     |
| Week 2 | 91.8 (n=5) | (67.3, 328)     | 143 (n=8)          | (40.0, 216)   | 0.86     |
| Week 3 | 94.9 (n=5) | (40, 2041)      | 1330 (n=3)         | (57.7, 3557)  | 0.53     |
| Week4  | 184 (n=6)  | (90.5, 471)     | 1895 (n=6)         | (669, 4825)   | 0.18     |

\*p-values were calculated using the Wilcoxon Rank Sum Test
